# Low-dose aspirin for *in vitro* fertilization: a systematic review and meta-analysis

T.A.Gelbaya<sup>1</sup>, M.Kyrgiou<sup>2</sup>, T.C.Li<sup>3</sup>, C.Stern<sup>4</sup> and L.G.Nardo<sup>5,6</sup>

<sup>1</sup>Department of Obstetrics and Gynaecology, Royal Bolton Hospital, Bolton, UK, <sup>2</sup>Department of Obstetrics and Gynaecology, Hammersmith Hospital, Queen Charlotte's and Chelsea Hospital, London, UK, <sup>3</sup>Department of Obstetrics and Gynaecology, Jessop Wing, Sheffield, UK, <sup>4</sup>Royal Women's Hospital and Melbourne IVF Unit, Melbourne, Australia and <sup>5</sup>Department of Reproductive Medicine, St Mary's Hospital and Division of Human Development, University of Manchester, UK

<sup>6</sup>Correspondence address: Department of Reproductive Medicine, St Mary's Hospital, CMMC University Hospitals, Whitworth Park, Manchester M13 0JH, UK. Fax:+44 0161-224-0957; E-mail: luciano.nardo@cmmc.nhs.uk

Despite recent advances in ovarian stimulation regimens and laboratory techniques, the pregnancy rate of assisted reproduction remains relatively low. New methods that would potentially improve implantation rates are needed. One proposed strategy involves enhancement of blood flow at the implantation site with the use of low-dose aspirin. We conducted a systematic review and meta-analysis to investigate the effect of low-dose aspirin on likelihood of pregnancy in women undergoing *in vitro* fertilization (IVF)/intracytoplasmic sperm injection (ICSI). An electronic search of the literature was conducted targeting reports published over the last 26 years. Only randomized controlled trials (RCTs) comparing aspirin with placebo or no treatment in IVF/ICSI women were included in the meta-analysis. A number of relevant outcomes including pregnancy and live birth (LB) rates were investigated. Pooled relative risk (RR) and 95% confidence interval (CI) were calculated using a random-effects model. Inter-study heterogeneity among the trials was assessed using the Cochran's *Q* test. Ten RCTs were identified from the literature search, six of which met the criteria for inclusion in the meta-analysis. Clinical pregnancy (CP) rate per embryo transfer (ET) was not found to be significantly different between patients who received low-dose aspirin and those who received placebo or no treatment (RR 1.09, 95% CI 0.92–1.29). None of the other outcomes, including CP per cycle, spontaneous abortion or ectopic pregnancy per CP and LB rate per cycle or ET was found to differ significantly between the compared groups. On the basis of up-to-date evidence, low-dose aspirin has no substantial positive effect on likelihood of pregnancy and, therefore, it should not be routinely recommended for women undergoing IVF/ICSI.

**Key words:** aspirin/IVF/implantation/endometrium/pregnancy

## Introduction

Low-dose acetylsalicylic acid (aspirin) irreversibly inhibits the enzyme cyclo-oxygenase in platelets, preventing the synthesis of thromboxane (Vane, 1971; Willis, 1974; Pedersen and Fitzgerald, 1984), which is a potent vasoconstrictive agent. The daily administration of aspirin in low doses induces a shift in the balance away from thromboxane A<sub>2</sub> and towards prostacyclin, leading to vasodilatation and increased blood perfusion (Patrono *et al.*, 2005). Aspirin has been found both experimentally and clinically to be cardioprotective, with few adverse effects in doses of 80–160 mg daily (Lorenz *et al.*, 1989). Treatment with low-dose aspirin in prevention of myocardial ischaemia is now widely recognized. Previous studies have shown that low-dose aspirin initiated in the second trimester of pregnancy in high-risk populations decreases the incidence of pre-eclampsia and preterm

labour and increases the birth weight of the newborn (Italian Study of Aspirin in Pregnancy, 1993; Collaborative Low-dose Aspirin Study in Pregnancy Collaborative Group, 1994). It has also been demonstrated that women with recurrent spontaneous abortion and antiphospholipid (APL) syndrome may benefit from low-dose aspirin therapy, especially when combined with unfractionated heparin (Kutteh, 1996; Rai *et al.*, 1997; Tulppala *et al.*, 1997).

The main factors that affect the outcome of *in vitro* fertilization (IVF) and intracytoplasmic sperm injection (ICSI) include the woman's age, number of oocytes retrieved, quality of the embryos transferred, ease of embryo transfer (ET) and endometrial receptivity (Weckstein *et al.*, 1997; Ebner *et al.*, 2000; Terriou *et al.*, 2001; Ziebe *et al.*, 2001; Tomas *et al.*, 2002). Various strategies have been used to improve ovarian response, including the use of higher doses of human menopausal gonadotrophins (hMG) or recombinant follicle-stimulating hormone (Land *et al.*,

1996; De Placido *et al.*, 2000), use of adjuvant growth hormone or growth hormone releasing factor (Dor *et al.*, 1995; Howles *et al.*, 1999), flare-up protocols (Karande *et al.*, 1997), administration of gonadotrophin-releasing hormone (GnRH) agonists (Surrey *et al.*, 1998) and GnRH antagonists (Akman *et al.*, 2001). Despite the introduction of all these interventions, the success of assisted reproductive technology (ART) has not increased markedly, thus leaving avenues for further research (Surrey and Schoolcraft 2000; Tarlatzis *et al.*, 2003).

A large body of evidence shows that APL antibodies, occasionally found in low-risk obstetric populations (Lockwood *et al.*, 1989; Stern *et al.*, 1998), are commonly found in women with reproductive dysfunction such as recurrent pregnancy loss (RPL) (Cowchock *et al.*, 1986; Matzner *et al.*, 1994; Yetman and Kutteh, 1996) and idiopathic infertility (Gleicher *et al.*, 1989, 1994; Birdsall *et al.*, 1996). Nevertheless, there is much controversy with regard to the association between APL antibodies and IVF outcome. Unlike the studies showing benefits after the use of heparin and aspirin in women with RPL (Kutteh, 1996; Rai *et al.*, 1997; Tulppala *et al.*, 1997), there is no consensus regarding its use in IVF patients.

Suboptimal uterine perfusion has been suggested as a possible cause of infertility (Goswamy and Steptoe, 1988). Impaired uterine blood flow may reduce endometrial receptivity resulting in embryo implantation failure (Battaglia *et al.*, 1990; Steer *et al.*, 1992). Since aspirin has been shown to increase uterine perfusion (Kuo *et al.*, 1997), it was not unreasonable to assume that aspirin administration may increase endometrial receptivity and blastocyst implantation. The evidence supporting the effect of low-dose aspirin in women undergoing IVF is, however, inconsistent. Several papers reported a beneficial effect of aspirin, whereas others failed to confirm these findings. Of interest, a retrospective series showed increased spontaneous abortion rate in women taking aspirin pre-conceptually (Li *et al.*, 2003).

In this paper, we present a systematic review and meta-analysis of the available literature on the use of aspirin in ART.

## Materials and methods

### Objective

The purpose of this review was to determine the effect of low-dose aspirin on the likelihood of pregnancy in women undergoing IVF/ICSI treatment cycles.

### Types of studies, interventions and inclusion and exclusion criteria

The systematic review included all types of studies investigating the effect of low-dose aspirin alone or in conjunction with heparin or glucocorticoids on IVF or ICSI outcome. For the purpose of the meta-analysis, all the available randomized controlled trials (RCTs) comparing the use of low-dose aspirin alone versus placebo or no treatment was considered.

Low-dose aspirin was defined as a dosage of 150 mg or less administered orally once a day. Aspirin was commenced at different stages of the treatment cycle (e.g. during down-regulation, during ovarian stimulation, after oocyte collection or on the day of ET) and was continued for a variable length of time (e.g. until confirmation of pregnancy by a positive pregnancy test or by detection of fetal heart activity on ultrasound, during pregnancy up to 34 weeks and up to

6 weeks postpartum). There were no sufficient data to warrant meta-analysis of trials that included specific subgroups of infertile patients, such as oocyte recipients or poor responders (Weckstein *et al.*, 1997; Lok *et al.*, 2004).

### Types of outcome measures

The outcome measures assessed in the analysis included pregnancy rate per ET, clinical pregnancy (CP) rate per cycle or ET, CP rate per elective single ET, spontaneous abortion or ectopic pregnancy rate per CP, live birth (LB) rate per cycle or ET, implantation rate and cycle cancellation rate (no embryos available for transfer).

### Data collection and statistical analysis

We searched four electronic databases—MEDLINE, EMBASE, Cochrane Controlled Trials Register (CENTRAL) and The UK National Research Register of ongoing and completed research projects undertaken in or for the UK National Health Service—from January 1980 to March 2006 using the key words '(aspirin or acetylsalicylic acid) and (IVF or ICSI)'. All the eligible abstracts were scrutinized in full text to identify those that qualified for this review. We also perused the references of retrieved articles, while additional MEDLINE cross-searches were performed using the names of investigators who were the lead authors of at least one eligible trial. The journals with the highest number of electronically identified trials were hand-searched (Hopewell *et al.*, 2002). The references of retrieved papers and the proceedings of relevant conferences were searched to identify other potentially eligible published or unpublished studies for inclusion in this review. There was no language restriction.

The literature search, the verification of inclusion and exclusion criteria and the extraction of data were undertaken and verified independently and blindly by the two principal investigators (T.A.G., L.G.N.). The results were then compared and a consensus was reached. The methodological quality of all the trials, including those published only in abstract form, was assessed with respect to randomization procedure, concealment of treatment allocation, blinding, co-intervention, sample size estimation, completeness of follow-up and differentiation between subjects and cycles.

Owing to significant heterogeneity among trials, we used the random-effects model (DerSimonian and Laird, 1986) to derive the summary estimates of the effect of treatment. Heterogeneity among studies for every outcome was assessed using the Cochran's *Q* test (Cochran, 1954). Relative risk (RR) and 95% confidence interval (CI) were calculated using the Revman 4.2 software. Formal statistical exploration for publication bias was not feasible due to the limited number of studies. Data analysis was performed by one of the investigators (M.K.). All authors participated in the review of the contents of the manuscript.

## Results

A total of six RCTs (Rubinstein *et al.*, 1999; Urman *et al.*, 2000; Van Dooren *et al.*, 2004; Waldenstrom *et al.*, 2004; Päckilä *et al.*, 2005; Duval *et al.*, 2006) were included in this meta-analysis. Two conferences' abstracts (Bordes *et al.*, 2003; Lentini *et al.*, 2003) were excluded as we failed to get a positive reply from the authors. Two more RCTs were excluded as they both involved subgroups of infertile patients—poor responders (Lok *et al.*, 2004) and oocyte recipients (Weckstein *et al.*, 1997). Two trials registered in the UK National Research Register were

identified and the authors contacted. No response was received from the author of the first trial (Zosmer, 1999), whereas the other author (Papaioannou, 2000) confirmed that the trial had not been completed (Fig. 1).

Table I summarizes the descriptive characteristics of the included studies in this systematic review that investigates the effect of low-dose aspirin on IVF/ICSI outcome. A total of 12 studies (10 RCTs and 2 retrospective studies) including 3189 cycles were reviewed. Only the first six trials in the table met the eligibility criteria for the meta-analysis. Aspirin was used in a dose of 75–100 mg per day in all studies.

Table II shows the total effect of the meta-analysis for all the examined outcomes in the eligible IVF/ICSI population. CP per ET was the only outcome to be analysed in all RCTs included in the meta-analysis. This was not found to be different between aspirin and no treatment groups (RR 1.09, 95% CI 0.92–1.29). Low-dose aspirin was not found to be associated with improved outcome in any of the examined parameters. The inter-study heterogeneity just reached statistical significance for one of the outcomes studied—CP/cycle ( $P = 0.05$ ).

The forest plots of the effect of aspirin versus placebo or no treatment on CP rate per ET, spontaneous abortion rate per CP and cycle cancellation rate (no embryos available for transfer) are presented in Figs. 2, 3, 4, respectively. Of note, only one conference abstract (Van Dooren *et al.*, 2004), whose quality measures were obtained in part, was retained in the meta-analysis, but excluding it did not change the overall results.

As shown in Table III, low-dose aspirin did not have any effect on CP per cycle or ET or on cycle cancellation in poor responders undergoing IVF (Lok *et al.*, 2004). In recipients of donated oocytes, low-dose aspirin improved implantation rate (24%

versus 9%, RR 2.74, 95% CI 1.13–6.62), but the effects on CP or LB per ET were not statistically significant (Weckstein *et al.*, 1997).

## Discussion

The published evidence regarding the efficacy of aspirin in IVF or ICSI cycles is controversial. The largest published RCT (Waldenstrom *et al.*, 2004) included 1380 cycles and found a marginally higher CP per ET in the aspirin group with no difference in the LB rate. The number of embryos transferred in the aspirin group was significantly higher. Of note, the number of previous cycles was not considered in the inclusion criteria. By considering only the first treatment cycle for individual women ( $n = 358$ ), similar results were obtained between the two study groups. Rubinstein *et al.* (1999) have reported higher CP and implantation rates, a remarkable increase in the ovarian response to stimulation as well as enhanced uterine and ovarian blood flow in the aspirin group. Other authors have noted higher pregnancy rate in the aspirin group but no significant difference in the other parameters (Bordes *et al.*, 2003). In a RCT, Mollo *et al.* (2003) reported lower first trimester spontaneous abortion rate in the aspirin/prednisone group, while pregnancy and implantation rates were similar between the two groups. Four other RCTs (Urman *et al.*, 2000; Lentini *et al.*, 2003; Van Dooren *et al.*, 2004; Pääkkilä *et al.*, 2005) failed to demonstrate any beneficial effect of aspirin on IVF outcome. The four-arm study by Duvan *et al.* (2006) revealed no significant differences in implantation and pregnancy rates among the compared populations—aspirin 100 mg/day, prednisolone 10 mg/day, aspirin 100 mg/day plus prednisolone 10 mg/day and controls. In a retrospective study, Hurst *et al.* (2005) have found a significantly lower implantation rate in the aspirin group (21 versus 30%,  $P = 0.01$ ). However, the retrospective design and the 5-year interval between the compared groups weakened the study conclusion. Another equally flawed, retrospective study (Zhang *et al.*, 2005) showed a significantly increased spontaneous abortion rate (21 versus 51%,  $P < 0.01$ ) in the aspirin group.

The current meta-analysis has shown that low-dose aspirin has no beneficial effect on pregnancy and LB rates or on cycle cancellation. Despite some diversity in the study populations and aspirin therapy regimens, a meta-analysis of the published RCTs was feasible. The treatment dose of aspirin varied slightly among different studies. As a dose of 80–160 mg daily in healthy volunteers (Cerletti *et al.*, 2003) and 0.5–2.0 mg/kg daily in hypertensive pregnant women (Vainio *et al.*, 1999) has been shown to increase the prostacyclin–thromboxane ratio, a dose of  $\leq 150$  mg daily should be sufficient to demonstrate the possible benefits of aspirin.

The theory behind the potential positive effects of aspirin is based on the hypotheses that low-dose aspirin enhances implantation and ovarian response to stimulation by increasing uterine and ovarian blood flow, respectively. The current analysis could not provide the data to confirm any of the hypotheses. This is unlikely to be due to the heterogeneity among the studies. In fact, the timing of aspirin administration was appropriate to test the first hypothesis in all but two studies (Waldenstrom *et al.*, 2004; Duvan *et al.*, 2006) as therapy was commenced on day 1 of stimulation or on day 21 of the preceding cycle. The

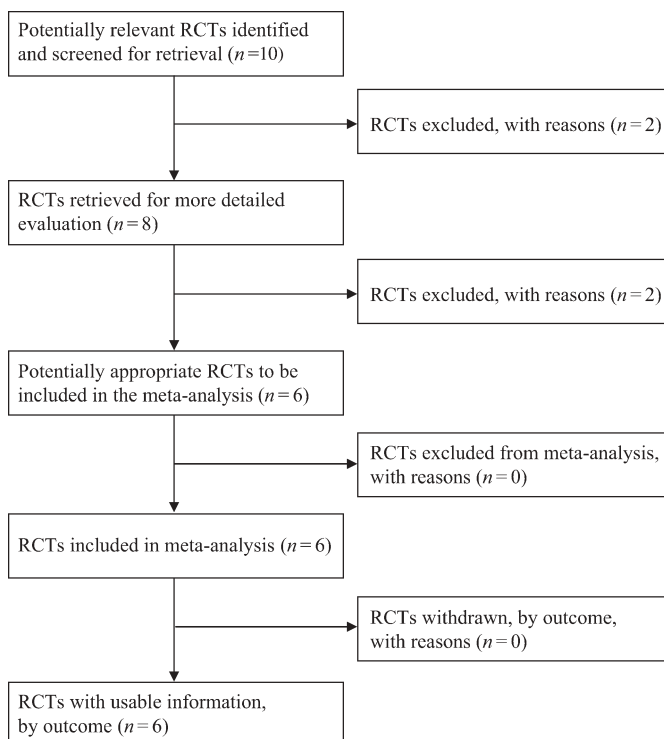

Figure 1. QUOROM statement flow diagram

**Table I.** Characteristics of controlled trials on low-dose aspirin and IVF outcome included in the systematic review

| Author                                     | Study design  | Duration of aspirin therapy                         | Number of ET cycles |                     | Patients' criteria                            | Comparison                                                                                     |
|--------------------------------------------|---------------|-----------------------------------------------------|---------------------|---------------------|-----------------------------------------------|------------------------------------------------------------------------------------------------|
|                                            |               |                                                     | Aspirin             | Placebo/<br>nothing |                                               |                                                                                                |
| Pakkila <i>et al.</i> (2005)               | RCT           | Day 1 of ovarian stimulation till delivery          | 174                 | 175                 | Age <40, <4 previous cycles                   | Aspirin 100 mg versus placebo                                                                  |
| Waldenstrom <i>et al.</i> (2004)           | RCT           | Day of ET till pregnancy test                       | 703                 | 677                 | Only patients who had ET                      | Aspirin 75 mg versus nothing                                                                   |
| Urman <i>et al.</i> (2000)                 | RCT           | Day 1 of ovarian stimulation till FH seen on US     | 139                 | 136                 | ICSI for male factor infertility              | Aspirin 80 mg versus nothing                                                                   |
| Rubinstein <i>et al.</i> (1999)            | RCT           | Day 21 of preceding cycle till 12 weeks             | 143                 | 136                 | IVF for tubal factor infertility              | Aspirin 100 mg versus placebo                                                                  |
| Duvan <i>et al.</i> (2006)                 | RCT           | Day of ET till pregnancy test                       | 41                  | 40                  | Non-selected patients, first ICSI cycle       | A. Aspirin 100 mg<br>B. Aspirin 100 mg + prednisone 10 mg<br>C. Prednisone 10 mg<br>D. Placebo |
| Van Dooren <i>et al.</i> (2004) (abstract) | RCT           | Day 16 till 10 weeks                                | 85                  | 85                  | Women <39, first IVF or ICSI                  | Aspirin 100 mg versus placebo                                                                  |
| Bordes <i>et al.</i> (2003) (abstract)     | RCT           | Day 21 till FH seen on US                           | 69                  | 69                  | Unselected IVF patients                       | Aspirin 100 mg versus placebo                                                                  |
| Lentini <i>et al.</i> (2003) (abstract)    | RCT           | 1 month before gonadotrophin till pregnancy test    | 42                  | 42                  | Unselected IVF patients                       | Aspirin 100 mg versus nothing                                                                  |
| Lok <i>et al.</i> (2004)                   | RCT           | Day 21 of preceding cycle till hCG                  | 17                  | 16                  | Poor responders <40                           | Aspirin 80 mg versus placebo                                                                   |
| Weckstein <i>et al.</i> (1997)             | RCT           | 1 week before estrogen supplementation till 9 weeks | 15                  | 13                  | Recipients of donated oocytes                 | Aspirin 80 mg versus nothing                                                                   |
| Hurst <i>et al.</i> (2005)                 | Retrospective | Day 21 of preceding cycle till pregnancy test       | 72                  | 244                 | Unselected IVF patients                       | Aspirin 80 mg versus nothing                                                                   |
| Zhang <i>et al.</i> (2005) (abstract)      | Retrospective | Day 21 of preceding cycle till 8 weeks              | 38                  | 45                  | Patients <40, had no less than 2 good embryos | Aspirin 81 mg versus nothing                                                                   |

**Table II.** Meta-analysis of all RCTs comparing aspirin versus placebo or no treatment in a standard IVF and/or ICSI population

| Outcome                              | Studies | Participants | With aspirin positive/<br>total (%) | Without aspirin<br>positive/total (%) | Pooled relative risk<br>(95% CI) | Heterogeneity<br>(P) |
|--------------------------------------|---------|--------------|-------------------------------------|---------------------------------------|----------------------------------|----------------------|
| Pregnancy rate/ET                    | 3       | 1612         | 303/817 (37.1)                      | 260/795 (32.7)                        | 1.13 (0.97–1.31)                 | 0.35                 |
| CP/cycle                             | 4       | 1142         | 190/570 (33.3)                      | 174/572 (30.4)                        | 1.08 (0.82–1.44)                 | 0.05                 |
| CP/ET                                | 6       | 2515         | 450/1273 (35.3)                     | 391/1242 (31.5)                       | 1.09 (0.92–1.29)                 | 0.11                 |
| CP/e-SET                             | 1       | 82           | 11/40 (27.5)                        | 13/42 (31.0)                          | 0.89 (0.45–1.75)                 | NA                   |
| Miscarriage/CP                       | 3       | 658          | 68/348 (19.5)                       | 51/310 (16.5)                         | 1.17 (0.84–1.63)                 | 0.98                 |
| Ectopic pregnancy/<br>CP             | 3       | 658          | 15/348 (4.3)                        | 14/310 (4.5)                          | 1.22 (0.34–4.38)                 | 0.10                 |
| Live birth/cycle                     | 1       | 374          | 32/186 (17.2)                       | 37/188 (19.7)                         | 0.87 (0.57–1.34)                 | NA                   |
| Live birth/ET                        | 2       | 1729         | 223/877 (25.4)                      | 194/852 (22.8)                        | 1.08 (0.83–1.40)                 | 0.21                 |
| No available embryos<br>for transfer | 4       | 1142         | 41/570 (7.2)                        | 47/572 (8.2)                          | 0.88 (0.54–1.43)                 | 0.25                 |
| Implantation rate                    | 1       | 348          | 17/174 (9.8)                        | 19/174 (12.9)                         | 0.89 (0.48–1.66)                 | NA                   |

NA: Not applicable.

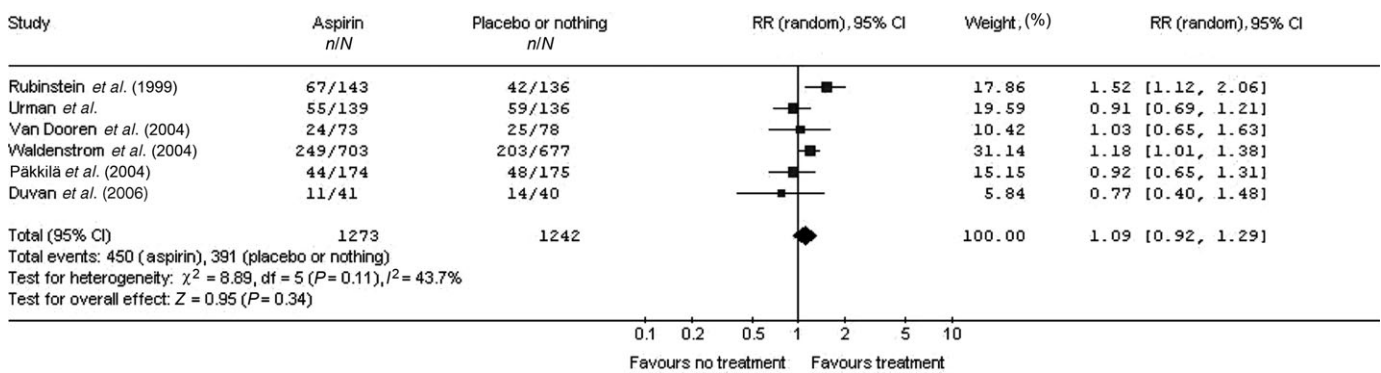

**Figure 2.** Forest plot of the effect of aspirin versus placebo or no treatment on clinical pregnancy rate per embryo transfer. Review: aspirin versus nothing in IVF. Comparison: aspirin versus placebo or no treatment. Outcome: clinical pregnancy/embryo transfer.

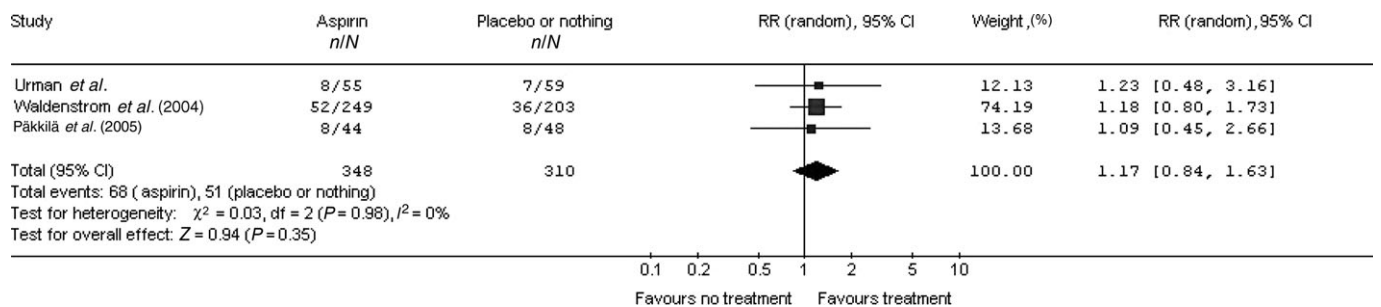

**Figure 3.** Forest plot of the effect of aspirin versus placebo or no treatment on miscarriage rate per clinical pregnancy. Review: aspirin versus nothing in IVF. Comparison: aspirin versus placebo or no treatment. Outcome: miscarriage/clinical pregnancy.

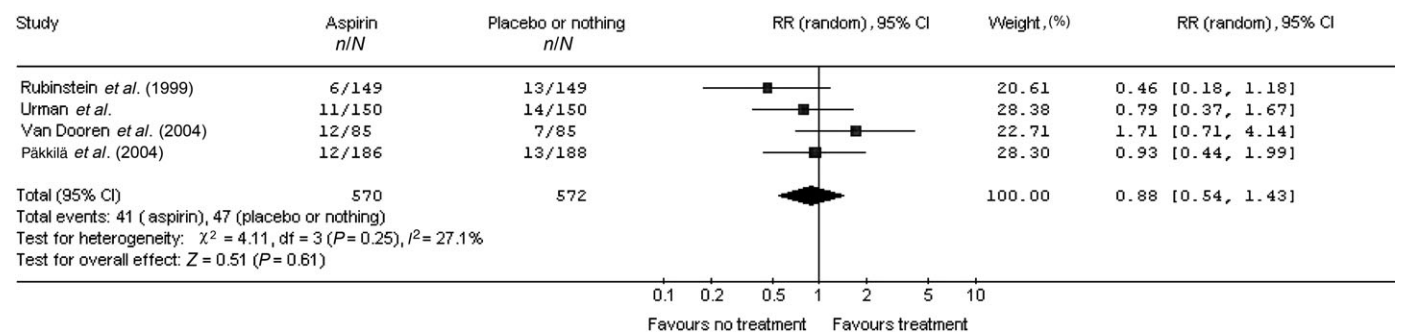

**Figure 4.** Forest plot of the effect of aspirin versus placebo or no treatment on cycle cancellation rate. Review: aspirin versus nothing in IVF. Comparison: aspirin versus placebo or no treatment. Outcome: no. of cycles cancelled/cycles.

**Table III.** Main results of the two RCTs comparing aspirin versus placebo in poor responders (Lok *et al.*, 2004) or oocytes recipients (Weckstein *et al.*, 1997)

| Study                          | Outcome measures                  | Treated group | Untreated group | RR (95% CI)      |
|--------------------------------|-----------------------------------|---------------|-----------------|------------------|
| Lok <i>et al.</i> (2004)       | CP/cycle                          | 1/30 (3)      | 2/30 (7)        | 0.50 (0.05–5.22) |
|                                | CP/ET                             | 1/17 (6)      | 2/16 (13)       | 0.47 (0.05–4.70) |
|                                | No available embryos for transfer | 8/30 (27)     | 10/30 (33)      | 0.93 (0.53–1.63) |
| Weckstein <i>et al.</i> (1997) | CP/ET                             | 9/15 (60)     | 4/13 (31)       | 1.95 (0.78–4.86) |
|                                | Live birth/ET                     | 7/15 (47)     | 4/13 (31)       | 1.52 (0.57–4.04) |
|                                | Implantation rate                 | 15/63 (24)    | 6/69 (9)        | 2.74 (1.13–6.62) |

hypothesis that improved ovarian stimulation outcome is the result of aspirin treatment was also tested using the same studies.

Undoubtedly, there is lack of strong evidence for the use of low-dose aspirin in frozen embryo replacement (FER) cycles. Wada *et al.* (1994) divided their study population into two groups according to Doppler uterine perfusion—women with normal perfusion did not receive treatment, whereas those with poor perfusion were given aspirin starting on day 13 of the HRT cycle. In the subsequent cycle, women with poor perfusion and some women with normal perfusion received aspirin (150 mg) on day 1 of the cycle. The authors concluded that low-dose aspirin improved uterine perfusion, especially when it was commenced on day 1 of the cycle. The pregnancy rate was similar between untreated women with normal perfusion and those in whom the perfusion improved after aspirin therapy. Of note, women with poor perfusion did not have embryo replacement, thus hampering the accurate assessment of aspirin efficacy in FER cycles. Another small controlled study (Check *et al.*, 1998) of 36 women undergoing FER following failed fresh ET revealed lower CP and implantation rates in the aspirin group compared with controls (11.1 versus 33.3% and 2.9 versus 10.9%, respectively).

As shown by the limited number of studies available in the literature, data are not robust enough to support the use of aspirin in women who respond poorly to ovarian stimulation (Lok *et al.*, 2004) and in those who receive donated oocytes (Weckstein *et al.*, 1997). Further studies are warranted prior to recommending aspirin treatment to these groups of patients.

In an attempt to comprehend the underlying causes of IVF implantation failure, there has been an emerging interest on the role of autoimmune factors. Although a higher prevalence of autoantibodies, especially APL, has been reported in women with recurrent spontaneous abortion (Cowchock *et al.*, 1986; Matzner *et al.*, 1994; Yetman and Kuttan, 1996) and idiopathic infertility (Gleicher *et al.*, 1989, 1994; Birdsall *et al.*, 1996), controversy regarding their association with IVF success rates still exists. Proponents of APL antibody-associated immunological dysfunction and infertility have suggested that APL antibodies other than lupus anticoagulant and anticardiolipin have an important effect on the likelihood of pregnancy in IVF (Kaider *et al.*, 1996; Coulam *et al.*, 1997). Other investigators using similarly large APL panel assays have been unable to reveal any relationship between APL antibodies and IVF outcome (Denis *et al.*, 1997; Chilcott *et al.*, 2000). A meta-analysis of seven studies that examined the relationship between APL seropositivity and IVF success also failed to confirm this association (Hornstein *et al.*, 2000).

The efficacy of immunological treatment in APL antibody-positive women undergoing IVF has been investigated, though

no consensus has been reached. In a study comprising 307 women positive for antinuclear antibodies and/or APL antibodies, Hasagewa *et al.* (1998) have found a 2-fold increase in pregnancy rate in women treated with prednisone and low-dose aspirin when compared with the untreated population. This is in agreement with another RCT that has demonstrated a significantly higher pregnancy rate in autoantibody-positive women taking the combined treatment compared with those who did not receive therapy (Geva *et al.*, 1998, 2000). Conversely, some authors have reported no beneficial effects following the use of immunological therapy in IVF. A prospective cohort study (Strehler *et al.*, 2002) of 549 women with a history of previous spontaneous abortion or at least two previous failed ET cycles receiving both prednisone and low-dose aspirin or no treatment revealed that pregnancy rates were not affected by treatment. Two studies reported no difference in pregnancy and implantation rates after IVF in APL antibody-positive patients treated with heparin and low-dose aspirin (Schenk *et al.*, 1996; Kutteh *et al.*, 1997). Recently, Stern *et al.* (2003) enrolled 143 autoantibody-positive women who had 10 or more failed ET cycles in a double-blind cross-over RCT. All patients received unfractionated heparin 5000 U and low-dose aspirin 100 mg or placebo from the day of ET until 14 weeks of gestation or fetal demise. Pregnancy rate per transfer, fetal heart implantation rate per embryo and LB rate per embryo were similar between treatment and placebo groups.

A review of the potential risks of aspirin therapy requires re-evaluating the prevailing view that aspirin is well tolerated when administered to women undergoing assisted reproduction. Analysis of the risk of bleeding following administration of diverse doses of aspirin in 192 036 patients enrolled in 31 RCTs revealed that even low-dose aspirin can be associated with bleeding, which may be classified as a major event in a small but significant percentage of patients (Serebruany *et al.*, 2005). Low-dose aspirin also resulted in a 2-fold increase in gastrointestinal bleeding in one study (Patrono *et al.*, 2005). A meta-analysis of 22 studies published between 1971 and 2002 reported that the use of aspirin in the first trimester of pregnancy was associated with a significantly increased risk of central nervous system defects, gastroschisis, cleft lip and palate (Kozer *et al.*, 2002).

This rigorously conducted systematic review and meta-analysis, which throws light upon the use of low-dose aspirin in women undergoing IVF, is mainly intended to provide an up-to-date source of information. By including only RCTs, it helps to make practitioners aware of the quality and quantity of the evidence available. Unfortunately, the heterogeneity of the studies included and the lack of adequately powered analyses may lead to debatable interpretations of some of the results. Any forthcoming RCT needs to be of sufficient statistical power to enable definite conclusions

about aspirin treatment in specific subgroups to be drawn. Future studies should investigate not exclusively the effect of low-dose aspirin on likelihood of pregnancy in IVF cycles but also the relationship with stimulation cycle outcome, maternal and neonatal morbidity.

## Conclusion

The concept that better uterine blood flow may improve implantation in ART is attractive, but the evidence evaluating the administration of low-dose aspirin for this purpose does not support its implementation in clinical practice. Currently, accumulating data exist that aspirin is not without side effects to both mother and fetus. Given the lack of proven efficacy and the actual potential for harm, this therapeutic strategy should not be routinely recommended to women undergoing assisted conception.

Couples undergoing ART are often desperate enough to try anything that may boost their fertility performance. Testing of any prescribed pharmacological compound is mandatory, so that potential benefits and risks are clearly presented to both clinicians and patients. Without doubt, randomized controlled studies are difficult to conduct, as couples are often unwilling to be randomly offered treatments that have previously failed. In agreement with Urman *et al.* (2005), we believe that fertility physicians should avoid offering treatment options that are not proven to work and they should always share with patients the available evidence, giving them a realistic view.

## References

- Akman MA, Erden HF, Tosun SB. *et al.* Comparison of agonistic flare-up-protocol and antagonistic multiple dose protocol in ovarian stimulation of poor responders: results of a prospective randomized trial. *Hum Reprod* 2001;**16**:868–70.
- Battaglia C, Larocca E, Lanzani A. *et al.* Doppler ultrasound studies of the uterine arteries in spontaneous and IVF stimulated ovarian cycles. *Gynecol Endocrinol* 1990;**4**:245–50.
- Birdsall MA, Lockwood GM, Ledger WL. *et al.* Antiphospholipid antibodies in women having in-vitro fertilization. *Hum Reprod* 1996;**11**:1185–89.
- Bordes A, Bied Damon VA, Hadj S. *et al.* Does aspirin improve IVF results? *Hum Reprod* 2003;**18**(Suppl 1):119.
- Cerletti C, Dell'Elba G, Manarini S. *et al.* Pharmacokinetic and pharmacodynamic differences between two low dosages of aspirin may affect therapeutic outcomes. *Clin Pharmacokinet* 2003;**42**:1059–70.
- Check JH, Dieterich C, Lurie D. *et al.* A matched study to determine whether low-dose aspirin without heparin improves pregnancy rates following frozen embryo transfer and/or affects endometrial sonographic parameters. *J Assist Reprod Genet* 1998;**15**:579–82.
- Chilcott IT, Margara R, Cohen H. *et al.* Pregnancy outcome is not affected by antiphospholipid antibody status in women referred for in vitro fertilization. *Fertil Steril* 2000;**73**:526–30.
- Cochran WG. The combination of estimates from different experiments. *Biometrics* 1954;**10**:101–29.
- Collaborative Low-dose Aspirin Study in Pregnancy Collaborative Group. CLASP: a randomised trial of low-dose aspirin for the prevention and treatment of pre-eclampsia among 9364 pregnant women. *Lancet* 1994;**343**:619–29.
- Coulam CB, Kaider BD, Kaider AS. *et al.* Antiphospholipid antibodies associated with implantation failure after IVF/ET. *J Assist Reprod Genet* 1997;**14**:603–8.
- Cowchock S, Smith JB, Gocial S. Antibodies to phospholipids and nuclear antigens in patients with related abortions. *Am J Obstet Gynecol* 1986;**155**:1002–10.
- De Placido G, Alviggi C, Mollo A. *et al.* Recombinant follicle stimulating hormone is effective in poor responders to highly purified follicle stimulating hormone. *Hum Reprod* 2000;**15**:17–20.
- Denis AL, Guido M, Adler RD. *et al.* Antiphospholipid antibodies and pregnancy rates and outcome in in vitro fertilization patients. *Fertil Steril* 1997;**67**:1084–90.
- DerSimonian R, and Laird N. Meta-analysis in clinical trials. *Control Clin Trials* 1986;**7**:177–88.
- Dor J, Seidman DS, Amudai E. *et al.* Adjuvant growth hormone therapy in poor responders to in-vitro fertilization: a prospective randomized placebo-controlled double-blind study. *Hum Reprod* 1995;**10**:40–3.
- Duvan CI, Ozmen B, Satýroglu H. *et al.* Does addition of low-dose aspirin and/or steroid as a standard treatment in nonselected intracytoplasmic sperm injection cycles improve in vitro fertilization success? A randomized, prospective, placebo-controlled study. *J Assist Reprod Genet* 2006;**23**:15–21.
- Ebner T, Yaman C, Moser M. *et al.* Prognostic value of first polar body morphology on fertilization rate and embryo quality in intracytoplasmic sperm injection. *Hum Reprod* 2000;**15**:427–30.
- Geva E, Amit A, Geva-Lerner L. *et al.* Prevention of early pregnancy loss in autoantibody seropositive women. *Lancet* 1998;**351**:34–5.
- Geva E, Amit A, Lerner-Geva L. *et al.* Prednisone and aspirin improve pregnancy rate in patients with reproductive failure and autoimmune antibodies: a prospective study. *Am J Reprod Immunol* 2000;**43**:36–40.
- Gleicher N, El-Roeiy A, Carfino E. *et al.* Reproductive failure because of autoantibodies: unexplained infertility and pregnancy wastage. *Am J Obstet Gynecol* 1989;**160**:1376–80.
- Gleicher N, Liu H, Dudkiewicz A. *et al.* Autoantibody profiles and immunoglobulin levels as predictors of IVF success. *Am J Obstet Gynecol* 1994;**170**:1145–49.
- Goswamy RK, Steptoe PC. Doppler ultrasound studies of the uterine artery in spontaneous ovarian cycles. *Hum Reprod* 1988;**3**:721–6.
- Hasegawa I, Yamanoto Y, Suzuki M. *et al.* Prednisolone plus low-dose aspirin improves the implantation rate in women with autoimmune conditions who are undergoing in vitro fertilization. *Fertil Steril* 1998;**70**:1044–48.
- Hopewell S, Clarke M, Lusher A. *et al.* A comparison of handsearching versus MEDLINE searching to identify reports of randomized controlled trials. *Stat Med* 2002;**21**:1625–34.
- Hornstein M, Davis O, Massey J. *et al.* Antiphospholipid antibodies and in vitro fertilization success: a meta-analysis. *Fertil Steril* 2000;**73**:330–3.
- Howles CM, Loumaye E, Germond M. *et al.* Does growth hormone-releasing factor assist follicular development in poor responder patients undergoing ovarian stimulation for in-vitro fertilization? *Hum Reprod* 1999;**14**:1939–43.
- Hurst BS, Bhojwani JT, Marshburn PB. *et al.* Low-dose aspirin does not improve ovarian stimulation, endometrial response, or pregnancy rates for in vitro fertilization. *J Exp Clin Assist Reprod* 2005;**2**:8.
- Italian Study of Aspirin in Pregnancy. Low-dose aspirin in prevention and treatment of intrauterine growth retardation and pregnancy-induced hypertension. *Lancet* 1993;**341**:396–400.
- Kaider BD, Price DE, Roussev RG. *et al.* Antiphospholipid antibody prevalence in patients with IVF failure. *Am J Reprod Immunol* 1996;**35**:388–93.
- Karande VC, Morris R, Rinehart J. *et al.* Limited success using the 'flare' protocol in poor responders in cycles with low basal follicle-stimulating hormone levels during in vitro fertilization. *Fertil Steril* 1997;**67**:900–3.
- Kozer E, Nikfar S, Costei A. *et al.* Aspirin consumption during the first trimester of pregnancy and congenital anomalies: a meta-analysis. *Am J Obstet Gynecol* 2002;**187**:1623–30.
- Kuo HC, Hsu CC, Wang ST. Aspirin improves uterine blood flow in the peri-implantation period. *J Formos Med Assoc* 1997;**96**:253–7.
- Kutteh W. Antiphospholipid antibody-associated recurrent pregnancy loss: treatment with heparin and low dose aspirin is superior to low dose aspirin alone. *Am J Obstet Gynecol* 1996;**174**:1584–9.
- Kutteh W, Yetman D, Chantilis S. *et al.* Effect of antiphospholipid antibodies in women undergoing in vitro fertilization: role of heparin and aspirin. *Hum Reprod* 1997;**12**:1171–5.
- Land JA, Yarmolinskaya MI, Dumoulin JCM. *et al.* High-dose human menopausal gonadotropin stimulation in poor responders does not improve in vitro fertilization outcome. *Fertil Steril* 1996;**65**:961–5.
- Lentini GM, Falcone P, Guidetti R. *et al.* Effects of low-dose aspirin on oocyte quality, fertilization rate, implantation and pregnancy rates in unselected patients undergoing IVF. *Hum Reprod* 2003;**18**(Suppl 1):40.
- Li DK, Liu L, Odouli R. Exposure to non-steroidal anti-inflammatory drugs during pregnancy and risk of miscarriage: population based cohort study. *Br Med J* 2003;**327**:368.

- Lockwood C, Romeros R, Feinberg R. *et al.* The prevalence and biological significance of lupus anticoagulant and anticardiolipin antibodies in a general obstetric population. *Am J Obstet Gynecol* 1989;**161**:369–73.
- Lok IH, Yip S, Cheung LP. Adjuvant low-dose aspirin therapy in poor responders undergoing in vitro fertilization: a prospective, randomized, double-blind, placebo-controlled trial. *Fertil Steril* 2004;**81**:556–61.
- Lorenz RL, Boehlig B, Uedelhoven WM. *et al.* Superior antiplatelet action on alternate day pulsed dosing versus split dose administration of aspirin. *Am J Cardiol* 1989;**64**:1185–8.
- Matzner W, Chong P, Xu G. *et al.* Characterisation of antiphospholipid antibodies in women with recurrent spontaneous abortions. *J Reprod Med* 1994;**39**:27–30.
- Mollo A, Varricchio MT, Strina I. *et al.* Prednisone plus low-dose aspirin in women with no autoimmune conditions undergoing ICSI. *Hum Reprod* 2003;**18**(Suppl 1):115–6.
- Päkkilä M, Räsänen J, Heinonen S. *et al.* Low-dose aspirin does not improve ovarian responsiveness or pregnancy rate in IVF and ICSI patients: a randomized, placebo-controlled double-blind study. *Hum Reprod* 2005;**20**:2211–4.
- Papaiannou S. The Effect of Low Dose Aspirin Co-treatment on the Outcome of In Vitro Fertilisation/Intracytoplasmic Sperm Injection. <http://www.nrr.nhs.uk/ViewDocument.asp?ID=N0047094998>, 2000.
- Patrono C, Garcia Rodriguez LA, Landolfi R. *et al.* Low-dose aspirin for the prevention of atherosclerosis. *N Engl J Med* 2005;**353**:2373–83.
- Pedersen AK, Fitzgerald GA. Dose-related kinetics of aspirin: presystemic acetylation of platelet cyclooxygenase. *N Engl J Med* 1984;**311**:1206–11.
- Rai R, Cohen H, Dave M. *et al.* Randomised controlled trial of aspirin and aspirin plus heparin in pregnant women with recurrent miscarriage associated with phospholipid antibodies (or antiphospholipid antibodies). *Br Med J* 1997;**314**:253–7.
- Rubinstein M, Marazzi A, Polak DF. Low dose aspirin treatment improves ovarian responsiveness, uterine and ovarian blood flow velocity, implantation and pregnancy rates in patients undergoing in vitro fertilization: a prospective, randomized double blind placebo controlled assay. *Fertil Steril* 1999;**71**:825–9.
- Schenk LM, Butler L, Monis JP. *et al.* Heparin and aspirin treatment yields higher implantation rates in IVF patients with antiphospholipid antibody seropositivity compared to untreated seronegative patients. *Fifty-Second Annual Meeting of the American Society for Reproductive Medicine* 1996; 2–6 November, 1996.
- Serebruany VL, Steinhubl SR, Berger PB. *et al.* Analysis of risk of bleeding complications after different doses of aspirin in 192,036 patients enrolled in 31 randomized controlled trials. *Am J Cardiol* 2005;**95**:1218–22.
- Steer CV, Campbell S, Tan SL. *et al.* The use of transvaginal color flow imaging after in vitro fertilization identifies optimum uterine conditions before embryo transfer. *Fertil Steril* 1992;**57**:372–6.
- Stern C, Chamley L, Hale L. *et al.* Antibodies to beta2 glycoprotein I are associated with in vitro fertilization implantation failure as well as recurrent miscarriage: results of a prevalence study. *Fertil Steril* 1998;**70**:938–44.
- Stern C, Chamley L, Norris H. *et al.* A randomized, double-blind, placebo-controlled trial of heparin and aspirin for women with in vitro fertilization implantation failure and antiphospholipid or antinuclear antibodies. *Fertil Steril* 2003;**80**:376–83.
- Strehler E, Abt M, Jelinkova V. *et al.* Prednisone plus aspirin has no significant effect on pregnancy rates in IVF/ICSI cycles. *Abstracts of the 18th Annual Meeting of the ESHRE*, Vienna, Austria, 2002, 117.
- Surrey ES, Schoolcraft WB. Evaluating strategies for improving ovarian response of the poor responder undergoing assisted reproductive techniques. *Fertil Steril* 2000;**73**:667–76.
- Surrey ES, Bower JA, Hill DM. *et al.* Clinical and endocrine effects of a microdose GnRH agonist flare regimen administered to poor responders who are undergoing in vitro fertilization. *Fertil Steril* 1998;**69**:419–24.
- Tarlatzis BC, Zepiridis L, Grimbizis G. *et al.* Clinical management of low ovarian response to stimulation for IVF: a systematic review. *Hum Reprod Update* 2003;**9**:61–7.
- Terriou P, Sapin C, Giorgetti C. *et al.* Embryo score is a better predictor of pregnancy than the number of transferred embryos or female age. *Fertil Steril* 2001;**75**:525–31.
- Tomas C, Tikkinen K, Tuomivaara L. *et al.* The degree of difficulty of embryo transfer is an independent factor for predicting pregnancy. *Hum Reprod* 2002;**17**:2632–5.
- Tulppala M, Marttunen M, Soderstrom-Anttila V. *et al.* Low-dose aspirin in prevention of miscarriage in women with unexplained or autoimmune related recurrent miscarriage: effect on prostacyclin and thromboxane A2 production. *Hum Reprod* 1997;**12**:1567–72.
- Urman B, Mercan R, Alatas C. *et al.* Low dose aspirin does not increase implantation rates in patients undergoing intracytoplasmic sperm injection: a prospective randomized study. *J Assist Reprod Genet* 2000;**17**:586–90.
- Urman B, Yakin K, Balaban B. Recurrent implantation failure in assisted reproduction: A. How to counsel and manage. B. Treatment options that have not been proven to benefit the couple. *RBM Online* 2005;**11**:382–91.
- Vainio M, Maenpaa J, Riutta A. *et al.* In the dose range of 0.5–2.0 mg/kg, acetylsalicylic acid does not affect prostacyclin production in hypertensive pregnancies. *Acta Obstet Gynecol Scand* 1999;**78**:82–8.
- Van Dooren IM, Schoot BC, Dargel E. *et al.* Low-dose aspirin demonstrates no positive effect on clinical results in the first in vitro fertilization (IVF) cycle. *Fertil Steril* 2004;**82**(Suppl 1):S18.
- Vane JR. Inhibition of prostaglandin synthesis as a mechanism of action for aspirin-like drugs. *Nature* 1971;**231**:232–5.
- Wada I, Hsu CC, Williams G. *et al.* The benefits of low-dose aspirin therapy in women with impaired uterine perfusion during assisted conception. *Hum Reprod* 1994;**9**:1954–7.
- Waldenström U, Hellberg D, Nilsson S. Low-dose aspirin in a short regimen as standard treatment in in vitro fertilization: a randomized, prospective study. *Fertil Steril* 2004;**81**:1560–4.
- Weckstein LN, Jacobson A, Galen D. *et al.* Low-dose aspirin for oocyte donation recipients with a thin endometrium: prospective, randomized study. *Fertil Steril* 1997;**68**:927–30.
- Willis AL. An enzymatic mechanism for the antithrombotic and antihemostatic actions of aspirin. *Science* 1974;**183**:325–7.
- Yetman DL, Kutteh WH. Antiphospholipid antibody panels and recurrent pregnancy loss: prevalence of anticardiolipin antibodies compared with other antiphospholipid antibodies. *Fertil Steril* 1996;**66**:540–6.
- Zhang L, Marynick SP, Pulman JM. *et al.* Low dose aspirin administration during ovarian stimulation adversely influences pregnancy outcome in in-vitro fertilization/embryo transfer (IVF/ET). *Fertil Steril* 2005;**83**:S14.
- Ziebe S, Loft A, Petersen JH. *et al.* Embryo quality and developmental potential is compromised by age. *Acta Obstet Gynecol Scand* 2001;**80**:169–74.
- Zosmer A. *Effect of Low Dose Aspirin Treatment on the Results of IVF Plus or Minus ICSI Treatment in an Unselected Population*. <http://www.nrr.nhs.uk/ViewDocument.asp?ID=N0205042829>, 1999.
